# Supplementary material for: Long-term safety and efficacy of alogliptin, a DPP-4 inhibitor, in patients with type 2 diabetes: a 3-year prospective, controlled, observational study (J-BRAND Registry)
Source: PubMed Central journal article supplement — BMJ Open Diabetes Res Care. 2021 Jan 13;9(1):e001787. doi: 10.1136/bmjdrc-2020-001787 (PMC7812112; doi:10.1136/bmjdrc-2020-001787), 2021-01-13
Supplement: bmjdrc-2020-001787supp001.pdf [file bmjdrc-2020-001787supp001.pdf]

## Online supplementary tables

**Online Supplementary Table 1 Other baseline laboratory parameters**

|                                                    | Group A          | Group B          | P value      |
|----------------------------------------------------|------------------|------------------|--------------|
|                                                    | (N=3395)         | (N=1755)         | Group A vs B |
|                                                    | Mean (SD)        | Mean (SD)        |              |
| AST (GOT) (IU/L)                                   | 26.1 (16.69)     | 27.2 (16.49)     | 0.048 *      |
| ALT (GPT) (IU/L)                                   | 27.9 (23.53)     | 31.6 (26.11)     | <0.001 ***   |
| Red blood cell count ( $\times 10^4/\mu\text{L}$ ) | 448.3 (60.64)    | 462.5 (56.18)    | <0.001 ***   |
| Hemoglobin (g/dL)                                  | 13.83 (1.664)    | 14.17 (1.643)    | <0.001 ***   |
| Hematocrit (%)                                     | 41.00 (4.716)    | 41.75 (4.483)    | <0.001 ***   |
| Platelet count (/mm <sup>3</sup> )                 | 21.38 (6.420)    | 21.62 (6.331)    | 0.279        |
| White cell count (/ $\mu\text{L}$ )                | 6597.7 (5864.19) | 6551.5 (5309.44) | 0.813        |
| Differential white blood cells /neutrophils (%)    | 58.79 (9.803)    | 58.29 (9.514)    | 0.334        |
| Differential white blood cells /eosinophils (%)    | 2.99 (3.051)     | 2.74 (1.945)     | 0.047 *      |
| Differential white blood cells /basophils (%)      | 0.61 (0.523)     | 0.64 (0.659)     | 0.369        |
| Differential white blood cells /lymphocytes (%)    | 31.19 (8.807)    | 32.15 (8.969)    | 0.039 *      |
| Differential white blood cells /monocytes (%)      | 5.96 (1.983)     | 5.72 (1.808)     | 0.014 *      |
| Glycoalbumin (%)                                   | 19.51 (4.745)    | 20.60 (6.733)    | 0.009 **     |
| Total protein (g/dL)                               | 7.25 (0.759)     | 7.22 (0.601)     | 0.302        |
| Blood urea nitrogen (mg/dL)                        | 15.88 (5.100)    | 15.17 (4.936)    | <0.001 ***   |
| Uric acid (mg/dL)                                  | 5.42 (2.535)     | 5.36 (3.059)     | 0.575        |
| Total bilirubin (mg/dL)                            | 0.75 (0.512)     | 0.80 (0.748)     | 0.071        |
| ALP (IU/L)                                         | 238.9 (88.77)    | 257.5 (99.02)    | <0.001 ***   |
| CK(CPK) (IU/L)                                     | 115.2 (90.21)    | 112.7 (85.86)    | 0.476        |
| LDH (IU/L)                                         | 198.0 (52.24)    | 195.1 (46.21)    | 0.135        |
| $\gamma$ -GTP (IU/L)                               | 45.1 (56.04)     | 49.8 (64.77)     | 0.035 *      |
| Amylase (IU/L)                                     | 77.2 (32.23)     | 71.1 (34.67)     | 0.002 **     |

Parameters were compared by t test.

ALP, alkaline phosphatase; ALT (GPT), alanine aminotransferase; AST (GOT), aspartate aminotransferase; CK (CPK), creatine kinase (creatine phosphokinase);  $\gamma$ -GTP, gamma-glutamyl transpeptidase; LDH, lactate dehydrogenase; SD, standard deviation.

**Online Supplementary Table 2 Summary of adverse events and serious adverse events**

| Endpoint category | AEs                                                    | Group A      | Group B     | P value      |
|-------------------|--------------------------------------------------------|--------------|-------------|--------------|
|                   |                                                        | (N=3395)     | (N=1755)    | Group A vs B |
|                   |                                                        | n (%)        | n (%)       |              |
| Overall AEs       |                                                        | 1449 (42.7%) | 740 (42.2%) | 0.744        |
| Hypoglycemia      |                                                        | 117 (3.4%)   | 53 (3.0%)   | 0.459        |
| Pancreatitis      |                                                        | 7 (0.2%)     | 3 (0.2%)    | 1.000        |
| Skin disorders    |                                                        | 215 (6.3%)   | 91 (5.2%)   | 0.106        |
|                   | Eczema (including nummular or systemic)                | 55 (1.6%)    | 18 (1.0%)   | 0.105        |
|                   | Pruritus                                               | 31 (0.9%)    | 15 (0.9%)   | 0.877        |
|                   | Rash (including systemic)                              | 23 (0.7%)    | 9 (0.5%)    | 0.576        |
|                   | Urticaria                                              | 22 (0.6%)    | 18 (1.0%)   | 0.179        |
|                   | Skin ulcer                                             | 10 (0.3%)    | 2 (0.1%)    | 0.241        |
|                   | Erythema (including annular, multiforme or systemic)   | 10 (0.3%)    | 9 (0.5%)    | 0.232        |
|                   | Skin exfoliation                                       | 3 (0.1%)     | 1 (0.1%)    | 1.000        |
|                   | Bullous pemphigoid                                     | 3 (0.1%)     | 0 (0.0%)    | 0.556        |
|                   | Photosensitivity disorder                              | 2 (0.1%)     | 2 (0.1%)    | 0.609        |
|                   | Pigmentation                                           | 1 (0.03%)    | 1 (0.1%)    | 1.000        |
|                   | Alopecia                                               | 1 (0.03%)    | 0 (0.0%)    | 1.000        |
|                   | Oculomucocutaneous syndrome (Stevens-Johnson syndrome) | 0 (0.0%)     | 0 (0.0%)    | NA           |
|                   | Other: Skin papilloma                                  | 0 (0.0%)     | 3 (0.2%)    | 0.040 *      |
| Infections        |                                                        | 348 (10.3%)  | 181 (10.3%) | 0.961        |
|                   | Upper respiratory tract infection                      | 110 (3.2%)   | 54 (3.1%)   | 0.802        |
|                   | Pneumonia                                              | 45 (1.3%)    | 19 (1.1%)   | 0.509        |
|                   | Cystitis                                               | 34 (1.0%)    | 15 (0.9%)   | 0.653        |
|                   | Bronchitis                                             | 33 (1.0%)    | 13 (0.7%)   | 0.439        |
|                   | Pharyngitis                                            | 25 (0.7%)    | 19 (1.1%)   | 0.204        |
|                   | Enteritis infectious                                   | 21 (0.6%)    | 11 (0.6%)   | 1.000        |

|        |                                                      |              |            |         |
|--------|------------------------------------------------------|--------------|------------|---------|
|        | Herpes zoster                                        | 21 (0.6%)    | 8 (0.5%)   | 0.558   |
|        | Pyelonephritis                                       | 12 (0.4%)    | 7 (0.4%)   | 0.811   |
|        | Sinusitis                                            | 5 (0.1%)     | 3 (0.2%)   | 1.000   |
|        | Sepsis                                               | 5 (0.1%)     | 0 (0.0%)   | 0.173   |
|        | Tonsillitis                                          | 4 (0.1%)     | 4 (0.2%)   | 0.457   |
|        | Herpes virus infection (excluding Herpes zoster)     | 4 (0.1%)     | 1 (0.1%)   | 0.667   |
|        | Otitis media                                         | 3 (0.1%)     | 2 (0.1%)   | 1.000   |
|        | Urethritis                                           | 2 (0.1%)     | 2 (0.1%)   | 0.609   |
|        | Furuncle                                             | 1 (0.03%)    | 0 (0.0%)   | 1.000   |
|        | Other: Vulvovaginal candidiasis                      | 0 (0.0%)     | 3 (0.2%)   | 0.040 * |
| Cancer |                                                      | 162 (4.8%)   | 62 (3.5%)  | 0.043*  |
|        | Lung cancer                                          | 32 (0.9%)    | 11 (0.6%)  | 0.262   |
|        | Large intestine carcinoma                            | 25 (0.7%)    | 9 (0.5%)   | 0.468   |
|        | Gastric cancer                                       | 20 (0.6%)    | 8 (0.5%)   | 0.690   |
|        | Prostate cancer                                      | 17 (0.5%)    | 5 (0.3%)   | 0.368   |
|        | Hepatic cancer                                       | 13 (0.4%)    | 3 (0.2%)   | 0.291   |
|        | Thyroid cancer                                       | 10 (0.3%)    | 2 (0.1%)   | 0.241   |
|        | Breast cancer                                        | 5 (0.1%)     | 3 (0.2%)   | 1.000   |
|        | Pancreatic cancer                                    | 5 (0.1%)     | 2 (0.1%)   | 1.000   |
|        | Uterine cancer (cervical cancer, endometrial cancer) | 3 (0.1%)     | 0 (0.0%)   | 0.556   |
|        | Other cancers                                        | 44 (1.3%)    | 27 (1.5%)  | 0.529   |
| Others |                                                      | 1060 (31.2%) | 564(32.1%) | 0.507   |
|        | Renal and urinary disorders (SOC) <sup>a</sup>       | 78 (2.3%)    | 25 (1.4%)  | 0.036 * |
|        | Iron deficiency anaemia                              | 18 (0.5%)    | 2 (0.1%)   | 0.030 * |
|        | Diabetes mellitus inadequate control                 | 16 (0.5%)    | 17 (1.0%)  | 0.042 * |
|        | Palpitations                                         | 5 (0.1%)     | 8 (0.5%)   | 0.044 * |
|        | Heat illness                                         | 2 (0.1%)     | 5 (0.3%)   | 0.050 * |
|        | Transient ischemic attack                            | 2 (0.1%)     | 5 (0.3%)   | 0.050 * |
|        | Cholangitis                                          | 1 (0.03%)    | 5 (0.3%)   | 0.020 * |

|                               | Gastric polyps                                                           | 1 (0.03%)    | 5 (0.3%)     | 0.020 *             |
|-------------------------------|--------------------------------------------------------------------------|--------------|--------------|---------------------|
|                               | Non-alcoholic steatohepatitis                                            | 1 (0.03%)    | 4 (0.2%)     | 0.049 *             |
|                               | Hand fracture                                                            | 0 (0.0%)     | 3 (0.2%)     | 0.040 *             |
| <b>Serious adverse events</b> |                                                                          |              |              |                     |
| <b>Endpoint category</b>      | <b>SOCs</b>                                                              | <b>n (%)</b> | <b>n (%)</b> | <b>Group A vs B</b> |
| Overall SAEs                  |                                                                          | 495 (14.6%)  | 220 (12.5%)  | 0.046 *             |
| Hypoglycemia                  |                                                                          | 3 (0.1%)     | 0 (0.0%)     | 0.556               |
| Pancreatitis                  |                                                                          | 3 (0.1%)     | 3 (0.2%)     | 0.416               |
| Skin disorders                |                                                                          | 3 (0.1%)     | 0 (0.0%)     | 0.556               |
| Infections                    |                                                                          | 71 (2.1%)    | 28 (1.6%)    | 0.240               |
| Cancer                        |                                                                          | 132 (3.9%)   | 48 (2.7%)    | 0.037 *             |
| Other SAEs                    |                                                                          | 348 (10.3%)  | 168 (9.6%)   | 0.463               |
|                               | Blood and lymphatic system disorders                                     | 4 (0.1%)     | 1 (0.1%)     | 0.667               |
|                               | Cardiac disorders                                                        | 82 (2.4%)    | 35 (2.0%)    | 0.375               |
|                               | Congenital, familial and genetic disorders                               | 1 (0.03%)    | 0 (0.0%)     | 1.000               |
|                               | Ear and labyrinth disorders                                              | 6 (0.2%)     | 2 (0.1%)     | 0.724               |
|                               | Endocrine disorders                                                      | 2 (0.1%)     | 1 (0.1%)     | 1.000               |
|                               | Eye disorders                                                            | 16 (0.5%)    | 10 (0.6%)    | 0.680               |
|                               | Gastrointestinal disorders                                               | 44 (1.3%)    | 20 (1.1%)    | 0.692               |
|                               | General disorders and administration site conditions                     | 16 (0.5%)    | 4 (0.2%)     | 0.240               |
|                               | Hepatobiliary disorders                                                  | 24 (0.7%)    | 11 (0.6%)    | 0.859               |
|                               | Immune system disorders                                                  | 0 (0.0%)     | 1 (0.1%)     | 0.341               |
|                               | Infections and infestations                                              | 15 (0.4%)    | 2 (0.1%)     | 0.070               |
|                               | Injury, poisoning and procedural complications                           | 50 (1.5%)    | 24 (1.4%)    | 0.806               |
|                               | Investigations                                                           | 5 (0.1%)     | 2 (0.1%)     | 1.000               |
|                               | Metabolism and nutrition disorders                                       | 30 (0.9%)    | 10 (0.6%)    | 0.246               |
|                               | Musculoskeletal and connective tissue disorders                          | 22 (0.6%)    | 9 (0.5%)     | 0.704               |
|                               | Neoplasms benign, malignant and unspecified (including cysts and polyps) | 6 (0.2%)     | 9 (0.5%)     | 0.052               |

|                                                 |           |           |       |
|-------------------------------------------------|-----------|-----------|-------|
| Nervous system disorders                        | 52 (1.5%) | 26 (1.5%) | 1.000 |
| Psychiatric disorders                           | 5 (0.1%)  | 5 (0.3%)  | 0.324 |
| Renal and urinary disorders                     | 12 (0.4%) | 3 (0.2%)  | 0.291 |
| Reproductive system and breast disorders        | 4 (0.1%)  | 1 (0.1%)  | 0.667 |
| Respiratory, thoracic and mediastinal disorders | 10 (0.3%) | 7 (0.4%)  | 0.610 |
| Skin and subcutaneous tissue disorders          | 1 (0.03%) | 1 (0.1%)  | 1.000 |
| Surgical and medical procedures                 | 26 (0.8%) | 16 (0.9%) | 0.625 |
| Vascular disorders                              | 10 (0.3%) | 10 (0.6%) | 0.157 |

All AEs were collected according to MedDRA version 15.1. AEs and SAEs were summarized for five major AE categories without defining limitations such as ‘symptomatic’ for hypoglycemia. AEs were also listed under ‘Other’ category only when significant between-group difference in their incidence was confirmed. ‘Other’ SAEs were summarized as those categorized in the individual MedDRA SOCs. Incidence (%) was calculated as a division of n for each AE category by either 3395 (Group A) or 1755 (Group B). P values were based on Fisher’s exact test.

<sup>a</sup> This SOC was listed because of a significant difference detected between the two groups, while no difference was observed for the individual AEs under the SOC.

AE, adverse event; NA, not applicable; SAE, serious adverse event; SOC, system organ class.

**Online Supplementary Table 3 Multivariate Cox regression analysis of cancer development**

| Variable                 | Category | N    | Patients with event | Univariate model (Cox regression) |                |                                    | Multivariate initial model with variables giving P<0.05 in univariate model |                |                                    | Multivariate final model after backward elimination with P<0.05 |        |                                    |
|--------------------------|----------|------|---------------------|-----------------------------------|----------------|------------------------------------|-----------------------------------------------------------------------------|----------------|------------------------------------|-----------------------------------------------------------------|--------|------------------------------------|
|                          |          |      |                     | HR                                | 95% CI         | [P for variable]<br>P for category | HR                                                                          | 95% CI         | [P for variable]<br>P for category | HR                                                              | 95% CI | [P for variable]<br>P for category |
| Whole population         |          | 5150 | 224                 | —                                 | —              | —                                  | —                                                                           | —              | —                                  | —                                                               | —      | —                                  |
| Group                    | Group A  | 3395 | 162                 | Reference                         | —              | —                                  | Reference                                                                   | —              | —                                  |                                                                 |        |                                    |
|                          | Group B  | 1755 | 62                  | 0.736                             | (0.549, 0.987) | 0.040*                             | 0.836                                                                       | (0.619, 1.128) | 0.241                              |                                                                 |        |                                    |
| Mode of study initiation | Start    | 1650 | 55                  | Reference                         | —              | [0.009**]                          | Reference                                                                   | —              | [0.155]                            |                                                                 |        |                                    |
|                          | Addition | 1563 | 62                  | 1.117                             | (0.777, 1.605) | 0.552                              | 1.045                                                                       | (0.703, 1.554) | 0.827                              |                                                                 |        |                                    |
|                          | Switch   | 1937 | 107                 | 1.586                             | (1.145, 2.195) | 0.005**                            | 1.344                                                                       | (0.931, 1.940) | 0.115                              |                                                                 |        |                                    |
| Number of previous OHAs  | 0        | 1650 | 55                  | Reference                         | —              | [0.216]                            |                                                                             |                |                                    |                                                                 |        |                                    |
|                          | 1        | 1549 | 74                  | 1.380                             | (0.973, 1.956) | 0.071                              |                                                                             |                |                                    |                                                                 |        |                                    |
|                          | 2        | 1196 | 60                  | 1.426                             | (0.989, 2.056) | 0.057                              |                                                                             |                |                                    |                                                                 |        |                                    |
|                          | ≥3       | 755  | 35                  | 1.281                             | (0.838, 1.957) | 0.252                              |                                                                             |                |                                    |                                                                 |        |                                    |

|                          |             |      |     |           |                |             |           |                |             |           |                |             |
|--------------------------|-------------|------|-----|-----------|----------------|-------------|-----------|----------------|-------------|-----------|----------------|-------------|
| Number of baseline OHAs  | 1           | 2140 | 94  | Reference | —              | [0.748]     |           |                |             |           |                |             |
|                          | 2           | 1641 | 72  | 0.958     | (0.705, 1.302) | 0.784       |           |                |             |           |                |             |
|                          | 3           | 1022 | 46  | 0.978     | (0.687, 1.392) | 0.902       |           |                |             |           |                |             |
|                          | ≥4          | 347  | 12  | 0.714     | (0.392, 1.302) | 0.272       |           |                |             |           |                |             |
| Age (years)              | <65         | 2389 | 41  | Reference | —              | [<0.001***] | Reference | —              | [<0.001***] | Reference | —              | [<0.001***] |
|                          | ≥65 and <75 | 1782 | 102 | 3.310     | (2.304, 4.757) | <0.001***   | 3.167     | (2.180, 4.602) | <0.001***   | 3.341     | (2.319, 4.814) | <0.001***   |
|                          | ≥75         | 979  | 81  | 5.249     | (3.605, 7.643) | <0.001***   | 5.086     | (3.410, 7.585) | <0.001***   | 5.543     | (3.775, 8.139) | <0.001***   |
|                          |             |      |     |           |                |             |           |                |             |           |                |             |
| Disease duration (years) | <1          | 827  | 34  | Reference | —              | [0.020*]    | Reference | —              | [0.081]     |           |                |             |
|                          | ≥1 and <5   | 1188 | 32  | 0.611     | (0.377, 0.990) | 0.046*      | 0.579     | (0.352, 0.952) | 0.031*      |           |                |             |
|                          | ≥5 and <10  | 1269 | 64  | 1.116     | (0.736, 1.692) | 0.604       | 0.875     | (0.558, 1.373) | 0.562       |           |                |             |
|                          | ≥10         | 1866 | 94  | 1.128     | (0.762, 1.670) | 0.548       | 0.688     | (0.443, 1.070) | 0.097       |           |                |             |
| BMI (kg/m <sup>2</sup> ) | <25         | 2753 | 141 | Reference | —              | [0.013*]    | Reference | —              | [0.645]     |           |                |             |



|                           |                |      |     |           |                    |           |           |                    |             |           |                |           |
|---------------------------|----------------|------|-----|-----------|--------------------|-----------|-----------|--------------------|-------------|-----------|----------------|-----------|
|                           | ≥25            | 2391 | 83  | 0.665     | (0.507, 0.873)     | 0.003**   | 0.876     | (0.665, 1.156)     | 0.350       |           |                |           |
|                           | Unknown        | 6    | 0   | <0.001    | (<0.001, >999.999) | 0.971     | <0.001    | (<0.001, >999.999) | 0.972       |           |                |           |
| HbA1c (%)                 | <6.0           | 159  | 10  | Reference | —                  | [0.237]   |           |                    |             |           |                |           |
|                           | ≥6.0 and <7.0  | 1146 | 56  | 0.722     | (0.369, 1.416)     | 0.344     |           |                    |             |           |                |           |
|                           | ≥7.0 and <8.0  | 1780 | 83  | 0.668     | (0.347, 1.287)     | 0.228     |           |                    |             |           |                |           |
|                           | ≥8.0           | 1294 | 46  | 0.544     | (0.274, 1.077)     | 0.081     |           |                    |             |           |                |           |
|                           | Unknown        | 771  | 29  | 0.516     | (0.251, 1.060)     | 0.072     |           |                    |             |           |                |           |
| Total cholesterol (mg/dL) | <220           | 2537 | 128 | Reference | —                  | [0.065]   |           |                    |             |           |                |           |
|                           | ≥220           | 614  | 21  | 0.701     | (0.442, 1.113)     | 0.132     |           |                    |             |           |                |           |
|                           | Unknown        | 1999 | 75  | 0.739     | (0.555, 0.982)     | 0.037*    |           |                    |             |           |                |           |
| Smoking status            | No history     | 2607 | 96  | Reference | —                  | [0.001**] | Reference | —                  | [<0.001***] | Reference | —              | [0.001**] |
|                           | Current smoker | 1018 | 36  | 1.005     | (0.685, 1.475)     | 0.979     | 1.444     | (0.976, 2.137)     | 0.066       | 1.461     | (0.987, 2.161) | 0.058     |

|          |      |    |       |         |           |       |         |           |       |         |           |
|----------|------|----|-------|---------|-----------|-------|---------|-----------|-------|---------|-----------|
| Previous | 1525 | 92 | 1.648 | (1.238, | <0.001*** | 1.730 | (1.298, | <0.001*** | 1.704 | (1.279, | <0.001*** |
| smoker   |      |    |       | 2.193)  |           |       | 2.304)  |           |       | 2.269)  |           |

Variates included in the model were group, mode of study initiation (i.e. 'start', 'addition' and 'switch'), number of OHAs previously used, number of OHAs used at baseline, age, disease duration, BMI, HbA1c, total cholesterol, and smoking status.

BMI, body mass index; CI, confidence interval; HbA1c, hemoglobin A1c; HR, hazard ratio; OHA, oral hypoglycemic agent.

**Online Supplementary Table 4 Over-time changes in other related parameters**

| Parameter       | Group           | Measurements/Changes <sup>a</sup> | Visit (year)          |           |            |             |             |             |        |        |
|-----------------|-----------------|-----------------------------------|-----------------------|-----------|------------|-------------|-------------|-------------|--------|--------|
|                 |                 |                                   | Baseline <sup>b</sup> | 0.5       | 1.0        | 1.5         | 2.0         | 2.5         | 3.0    |        |
| Weight (kg)     | A               | Data fixed                        | 3395                  | 3358      | 3125       | 2974        | 2805        | 2631        | 2455   |        |
|                 |                 | Measurements                      | N                     | 2235      | 3067       | 2740        | 2559        | 2398        | 2219   | 1193   |
|                 |                 |                                   | Mean                  | 65.11     | 64.78      | 64.96       | 64.99       | 65.06       | 65.07  | 65.50  |
|                 |                 |                                   | SD                    | 14.227    | 14.066     | 13.968      | 13.992      | 13.860      | 13.902 | 14.041 |
|                 |                 | Changes                           | N                     | —         | 2036       | 1811        | 1698        | 1571        | 1452   | 1005   |
|                 |                 |                                   | Mean                  | —         | -0.20      | -0.17       | -0.24       | -0.34       | -0.62  | -0.81  |
|                 |                 |                                   | SD                    | —         | 3.095      | 3.357       | 3.781       | 3.900       | 4.277  | 4.341  |
|                 | 1-sample t test | —                                 | P=0.003 **            | P=0.034 * | P=0.010 *  | P<0.001 *** | P<0.001 *** | P<0.001 *** |        |        |
|                 | B               | Data fixed                        | 1755                  | 1738      | 1619       | 1519        | 1427        | 1360        | 1280   |        |
|                 |                 | Measurements                      | N                     | 1084      | 1590       | 1431        | 1309        | 1242        | 1166   | 630    |
|                 |                 |                                   | Mean                  | 67.72     | 67.66      | 67.62       | 67.31       | 67.09       | 66.97  | 66.34  |
|                 |                 |                                   | SD                    | 14.814    | 14.987     | 15.141      | 14.897      | 14.767      | 14.714 | 14.713 |
|                 |                 | Changes                           | N                     | —         | 977        | 878         | 806         | 762         | 708    | 492    |
|                 |                 |                                   | Mean                  | —         | -0.40      | -0.37       | -0.38       | -0.50       | -0.52  | -0.92  |
| SD              |                 |                                   | —                     | 3.505     | 4.080      | 4.496       | 4.412       | 4.506       | 4.931  |        |
| 1-sample t test | —               | P<0.001 ***                       | P=0.007 **            | P=0.017 * | P=0.002 ** | P=0.002 **  | P<0.001 *** |             |        |        |

| Group<br>A vs B |   | Measurements | 2-sample t<br>test                | P<0.001<br>***  | P<0.001<br>***  | P<0.001<br>***  | P<0.001<br>***  | P<0.001<br>***  | P<0.001<br>***  | P=0.237         |
|-----------------|---|--------------|-----------------------------------|-----------------|-----------------|-----------------|-----------------|-----------------|-----------------|-----------------|
|                 |   | Changes      | 2-sample t<br>test                | —               | P=0.144         | P=0.190         | P=0.433         | P=0.421         | P=0.620         | P=0.691         |
| 12-lead ECG     | A | Examined     |                                   | 681<br>(100.0%) | 624<br>(100.0%) | 509<br>(100.0%) | 410<br>(100.0%) | 460<br>(100.0%) | 375<br>(100.0%) | 200<br>(100.0%) |
|                 |   |              | Normal                            | 435<br>(63.9%)  | 403<br>(64.6%)  | 313<br>(61.5%)  | 240<br>(58.5%)  | 279<br>(60.7%)  | 221<br>(58.9%)  | 121<br>(60.5%)  |
|                 |   |              | Of no<br>clinical<br>significance | 196<br>(28.8%)  | 191<br>(30.6%)  | 180<br>(35.4%)  | 149<br>(36.3%)  | 164<br>(35.7%)  | 136<br>(36.3%)  | 69 (34.5%)      |
|                 |   |              | Of clinical<br>significance       | 50 (7.3%)       | 30 (4.8%)       | 16 (3.1%)       | 21 (5.1%)       | 17 (3.7%)       | 18 (4.8%)       | 10 (5.0%)       |
|                 | B | Examined     |                                   | 408<br>(100.0%) | 332<br>(100.0%) | 232<br>(100.0%) | 215<br>(100.0%) | 231<br>(100.0%) | 202<br>(100.0%) | 102<br>(100.0%) |
|                 |   |              | Normal                            | 289<br>(70.8%)  | 230<br>(69.3%)  | 152<br>(65.5%)  | 131<br>(60.9%)  | 154<br>(66.7%)  | 114<br>(56.4%)  | 55 (53.9%)      |
|                 |   |              | Of no<br>clinical<br>significance | 101<br>(24.8%)  | 89 (26.8%)      | 69 (29.7%)      | 80 (37.2%)      | 71 (30.7%)      | 81 (40.1%)      | 43 (42.2%)      |
|                 |   |              | Of clinical<br>significance       | 18 (4.4%)       | 13 (3.9%)       | 11 (4.7%)       | 4 (1.9%)        | 6 (2.6%)        | 7 (3.5%)        | 4 (3.9%)        |

|                                 |                    | Group<br>A vs B    | $\chi^2$ test      | P=0.032 *      | P=0.337        | P=0.220        | P=0.141        | P=0.281        | P=0.551        | P=0.419        |       |
|---------------------------------|--------------------|--------------------|--------------------|----------------|----------------|----------------|----------------|----------------|----------------|----------------|-------|
| Total<br>cholesterol<br>(mg/dL) | A                  | Measurements       | N                  | 2104           | 2406           | 2234           | 2079           | 1962           | 1801           | 1126           |       |
|                                 |                    |                    | Mean               | 188.0          | 182.5          | 182.0          | 181.2          | 182.2          | 182.1          | 181.6          |       |
|                                 |                    |                    | SD                 | 35.02          | 32.46          | 32.12          | 31.92          | 33.49          | 32.83          | 32.45          |       |
|                                 |                    | Changes            | N                  | —              | 1915           | 1745           | 1616           | 1511           | 1385           | 946            |       |
|                                 |                    |                    | Mean               | —              | -5.4           | -5.9           | -6.4           | -5.4           | -5.4           | -5.1           |       |
|                                 |                    |                    | SD                 | —              | 28.22          | 27.98          | 30.38          | 31.17          | 34.20          | 34.33          |       |
|                                 |                    | 1-sample t<br>test | —                  | P<0.001<br>*** |       |
|                                 |                    | B                  | Measurements       | N              | 1047           | 1276           | 1126           | 1052           | 994            | 897            | 524   |
|                                 |                    |                    |                    | Mean           | 195.7          | 187.6          | 186.8          | 186.7          | 185.7          | 185.4          | 185.8 |
|                                 | SD                 |                    |                    | 39.55          | 33.73          | 33.41          | 33.27          | 34.65          | 33.32          | 34.56          |       |
|                                 | Changes            |                    | N                  | —              | 955            | 815            | 755            | 697            | 629            | 410            |       |
|                                 |                    |                    | Mean               | —              | -6.7           | -8.0           | -7.1           | -7.7           | -7.7           | -10.8          |       |
|                                 |                    |                    | SD                 | —              | 31.22          | 32.74          | 34.42          | 33.94          | 34.21          | 37.41          |       |
|                                 | 1-sample t<br>test |                    | —                  | P<0.001<br>*** |       |
| Group<br>A vs B                 | Measurements       |                    | 2-sample t<br>test | P<0.001<br>*** | P<0.001<br>*** | P<0.001<br>*** | P<0.001<br>*** | P=0.007 **     | P=0.015 *      | P=0.017 *      |       |

|                         |              | Changes      | 2-sample t test | —               | P=0.277 | P=0.112 | P=0.656 | P=0.142 | P=0.158 | P=0.008 ** |         |
|-------------------------|--------------|--------------|-----------------|-----------------|---------|---------|---------|---------|---------|------------|---------|
| HDL cholesterol (mg/dL) | A            | Measurements | N               | 2677            | 3035    | 2780    | 2588    | 2447    | 2259    | 1442       |         |
|                         |              |              | Mean            | 54.7            | 54.4    | 54.6    | 54.7    | 54.8    | 55.0    | 55.2       |         |
|                         |              |              | SD              | 17.69           | 15.24   | 15.06   | 18.26   | 19.27   | 19.88   | 15.56      |         |
|                         |              | Changes      | N               | —               | 2543    | 2311    | 2146    | 2011    | 1856    | 1287       |         |
|                         |              |              | Mean            | —               | -0.2    | -0.5    | -0.3    | -0.2    | -0.2    | 0.2        |         |
|                         |              |              | SD              | —               | 13.39   | 13.24   | 17.74   | 18.61   | 14.68   | 15.77      |         |
|                         |              |              |                 | 1-sample t test | —       | P=0.351 | P=0.098 | P=0.462 | P=0.703 | P=0.548    | P=0.673 |
|                         | B            | Measurements | N               | 1333            | 1573    | 1401    | 1300    | 1215    | 1124    | 693        |         |
|                         |              |              | Mean            | 54.1            | 54.8    | 55.2    | 55.5    | 55.0    | 54.6    | 55.4       |         |
|                         |              |              | SD              | 21.65           | 14.63   | 14.89   | 17.45   | 14.72   | 14.38   | 14.94      |         |
|                         |              | Changes      | N               | —               | 1258    | 1114    | 1025    | 956     | 886     | 599        |         |
|                         |              |              | Mean            | —               | 0.7     | 1.0     | 1.3     | 0.5     | 0.0     | 0.5        |         |
| SD                      |              |              | —               | 18.51           | 19.11   | 23.43   | 21.20   | 22.02   | 26.25   |            |         |
|                         |              |              | 1-sample t test | —               | P=0.166 | P=0.073 | P=0.069 | P=0.506 | P=0.968 | P=0.660    |         |
| Group A vs B            | Measurements |              | P=0.358         | P=0.330         | P=0.261 | P=0.194 | P=0.759 | P=0.493 | P=0.759 |            |         |

|                               |                    | Changes      | —              | P=0.097        | P=0.020 *      | P=0.051        | P=0.444        | P=0.774        | P=0.805        |       |
|-------------------------------|--------------------|--------------|----------------|----------------|----------------|----------------|----------------|----------------|----------------|-------|
| LDL<br>cholesterol<br>(mg/dL) | A                  | Measurements | N              | 2575           | 2930           | 2673           | 2524           | 2381           | 2201           | 1397  |
|                               |                    |              | Mean           | 109.3          | 104.5          | 103.8          | 102.8          | 103.2          | 102.6          | 101.5 |
|                               |                    |              | SD             | 31.13          | 28.32          | 27.11          | 28.09          | 27.64          | 27.23          | 26.96 |
|                               |                    | Changes      | N              | —              | 2432           | 2193           | 2041           | 1907           | 1766           | 1229  |
|                               |                    |              | Mean           | —              | -4.9           | -5.5           | -6.0           | -5.6           | -6.4           | -7.1  |
|                               |                    |              | SD             | —              | 25.06          | 26.11          | 27.97          | 28.86          | 30.11          | 31.43 |
|                               | 1-sample t<br>test | —            | P<0.001<br>*** |       |
|                               | B                  | Measurements | N              | 1286           | 1538           | 1369           | 1277           | 1196           | 1116           | 663   |
|                               |                    |              | Mean           | 115.7          | 108.6          | 107.0          | 105.9          | 105.2          | 104.5          | 103.6 |
|                               |                    |              | SD             | 33.92          | 29.17          | 28.41          | 29.05          | 28.53          | 27.98          | 28.02 |
|                               |                    | Changes      | N              | —              | 1203           | 1060           | 975            | 906            | 843            | 563   |
|                               |                    |              | Mean           | —              | -7.3           | -8.8           | -9.8           | -10.0          | -9.9           | -12.3 |
|                               |                    |              | SD             | —              | 29.13          | 29.52          | 32.77          | 32.67          | 31.16          | 34.53 |
|                               | 1-sample t<br>test | —            | P<0.001<br>*** |       |
| Group<br>A vs B               | Measurements       |              | P<0.001<br>*** | P<0.001<br>*** | P<0.001<br>*** | P=0.001 **     | P=0.040 *      | P=0.060        | P=0.103        |       |
|                               | Changes            |              | —              | P=0.014 *      | P=0.002 **     | P=0.002 **     | P<0.001        | P=0.006 **     | P=0.002 **     |       |

|                               |                 | ***             |              |           |         |           |            |         |         |         |         |
|-------------------------------|-----------------|-----------------|--------------|-----------|---------|-----------|------------|---------|---------|---------|---------|
| Fasting triglycerides (mg/dL) | A               | Measurements    | N            | 1809      | 2101    | 1927      | 1704       | 1629    | 1480    | 942     |         |
|                               |                 |                 | Mean         | 137.4     | 133.0   | 132.3     | 132.8      | 132.1   | 132.3   | 133.3   |         |
|                               |                 |                 | SD           | 85.19     | 83.98   | 92.28     | 97.66      | 88.57   | 87.33   | 87.57   |         |
|                               |                 | Changes         | N            | —         | 1481    | 1287      | 1159       | 1076    | 969     | 689     |         |
|                               |                 |                 | Mean         | —         | -2.6    | -1.6      | -1.7       | -1.8    | -3.8    | -2.3    |         |
|                               |                 |                 | SD           | —         | 77.94   | 78.84     | 94.07      | 90.94   | 85.32   | 84.58   |         |
|                               |                 | 1-sample t test | —            | P=0.208   | P=0.477 | P=0.541   | P=0.521    | P=0.171 | P=0.482 |         |         |
|                               |                 | B               | Measurements | N         | 886     | 1099      | 992        | 863     | 856     | 771     | 437     |
|                               |                 |                 |              | Mean      | 143.8   | 135.0     | 136.5      | 133.0   | 131.9   | 133.0   | 137.0   |
|                               | SD              |                 |              | 92.72     | 93.64   | 90.58     | 95.13      | 81.20   | 92.56   | 95.62   |         |
|                               | Changes         |                 | N            | —         | 719     | 612       | 550        | 510     | 450     | 298     |         |
|                               |                 |                 | Mean         | —         | -7.0    | -1.8      | -7.9       | -9.6    | -9.0    | -8.5    |         |
|                               |                 |                 | SD           | —         | 80.15   | 86.05     | 88.46      | 76.17   | 100.08  | 85.99   |         |
|                               | 1-sample t test |                 | —            | P=0.020 * | P=0.614 | P=0.037 * | P=0.004 ** | P=0.057 | P=0.089 |         |         |
|                               | Group A vs B    |                 | Measurements |           | P=0.086 | P=0.554   | P=0.240    | P=0.958 | P=0.946 | P=0.856 | P=0.496 |
| Changes                       |                 |                 |              | —         | P=0.214 | P=0.963   | P=0.194    | P=0.073 | P=0.337 | P=0.291 |         |



<sup>a</sup> Changes mean those from baseline measurements and were calculated for the patients with measurements available at baseline and the predefined visit.

<sup>b</sup> The mean baseline values in this supplementary table may be somewhat different from those seen in table 1. This is because table 1 presents mean values calculated for the SAS patients with measurements, while supplementary table 4 presents values calculated for the SAS patients for whom measurements were performed within the study protocol-defined time window i.e. Day -92 through Day 31 (as baseline) relative to Day 0 (i.e. the date of ‘start’, ‘addition’ or ‘switch’), also explaining apparent differences in N between the two tables.

ECG, electrocardiography; HDL, high density lipoprotein; LDL, low density lipoprotein.
