# Supplementary material for: Long-term safety and efficacy of alogliptin, a DPP-4 inhibitor, in patients with type 2 diabetes: a 3-year prospective, controlled, observational study (J-BRAND Registry)
Source: PubMed Central journal article supplement — BMJ Open Diabetes Res Care. 2021 Jan 13;9(1):e001787. doi: 10.1136/bmjdrc-2020-001787 (PMC7812112; doi:10.1136/bmjdrc-2020-001787), 2021-01-13
Supplement: bmjdrc-2020-001787supp002.pdf [file bmjdrc-2020-001787supp002.pdf]

## Online Supplementary Figure 1 Over-time profile of the usage of oral hypoglycemic agents

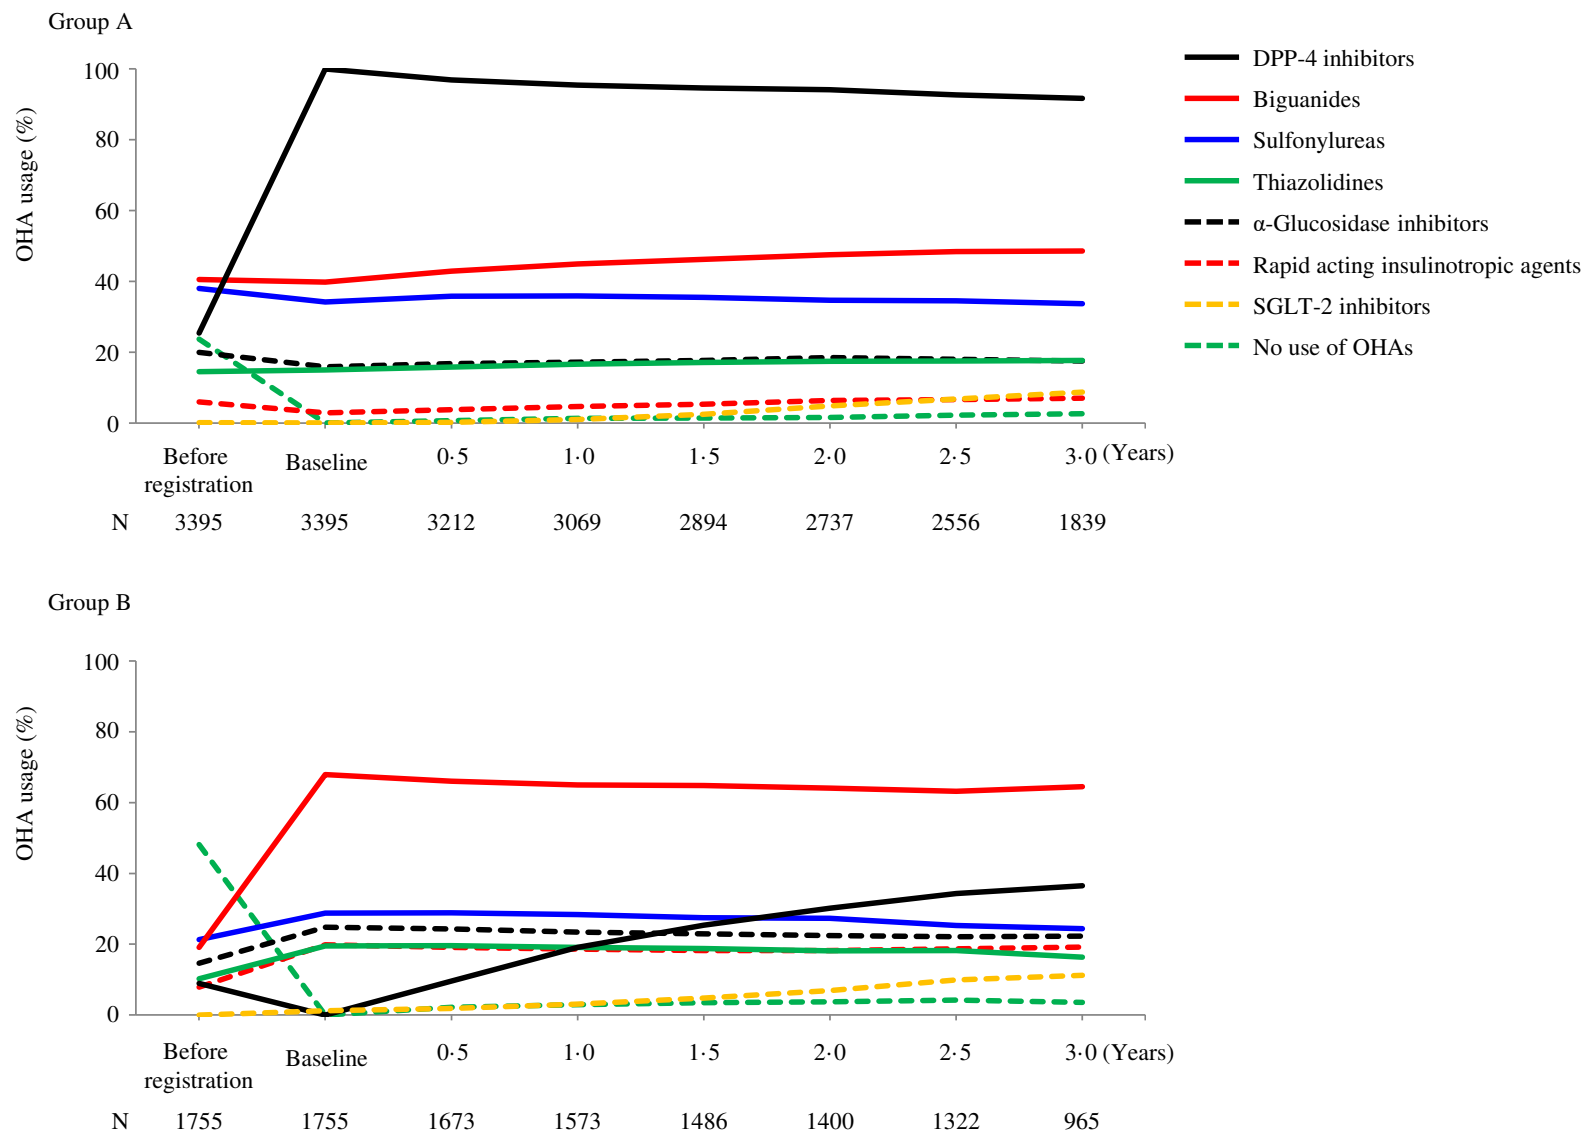

Online Supplementary Figure 2 Kaplan-Meier analysis of microvascular complications

A Retinopathy

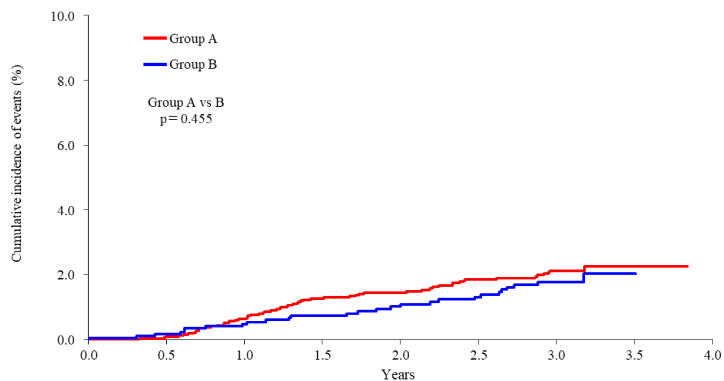

|         |   |      |      |      |      |      |      |      |   |   |
|---------|---|------|------|------|------|------|------|------|---|---|
| Group A | N | 3395 | 3214 | 3049 | 2858 | 2698 | 2511 | 1803 | 2 | 0 |
| Group B | N | 1755 | 1671 | 1565 | 1474 | 1385 | 1308 | 949  | 1 | 0 |

B Nephropathy

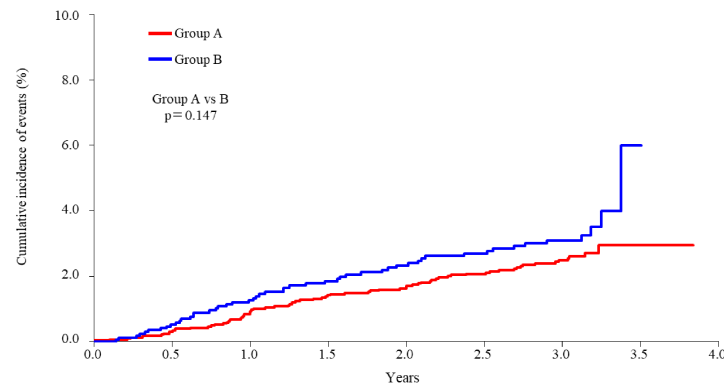

|         |   |      |      |      |      |      |      |      |   |   |
|---------|---|------|------|------|------|------|------|------|---|---|
| Group A | N | 3395 | 3207 | 3040 | 2853 | 2689 | 2507 | 1802 | 2 | 0 |
| Group B | N | 1755 | 1665 | 1553 | 1459 | 1367 | 1287 | 934  | 1 | 0 |

C Neuropathy

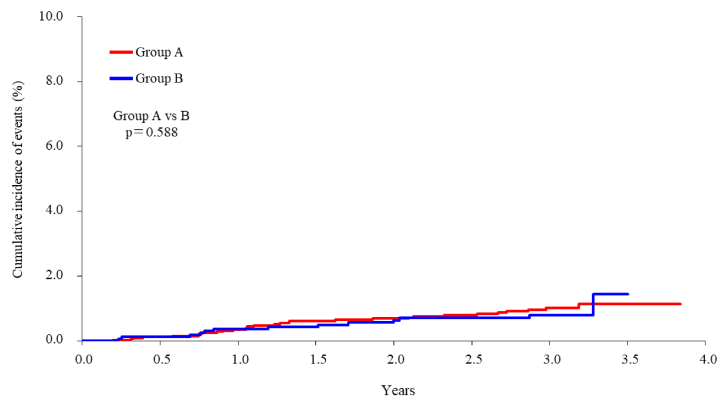

|         |   |      |      |      |      |      |      |      |   |   |
|---------|---|------|------|------|------|------|------|------|---|---|
| Group A | N | 3395 | 3213 | 3058 | 2879 | 2719 | 2538 | 1819 | 2 | 0 |
| Group B | N | 1755 | 1672 | 1567 | 1480 | 1392 | 1314 | 956  | 1 | 0 |

Online Supplementary Figure 3 Over-time changes of HbA1c

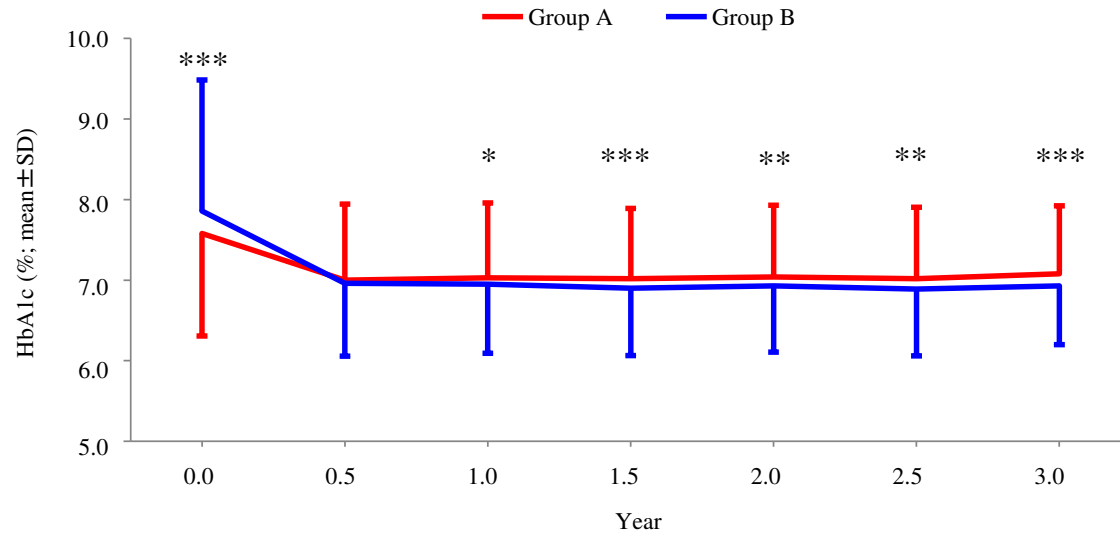

|         |   |      |      |      |      |      |      |      |
|---------|---|------|------|------|------|------|------|------|
| Group A | N | 2903 | 3057 | 2615 | 2327 | 2070 | 1782 | 1074 |
| Group B | N | 1438 | 1418 | 1107 | 914  | 780  | 668  | 382  |

## Legends for Online Supplementary Figures

### **Online Supplementary Figure 1 Over-time profile of the usage of oral hypoglycemic agents**

OHA usage was profiled over time as the percentage (%) of individual drug class used in the patients at each visit. Note Group A patients mostly (90% or more) continued to use alogliptin (or other DPP-4 inhibitors), while in Group B, a majority (60-70%) of patients continued to use biguanides, and the use of DPP-4 inhibitors gradually increased (up to ~36%) becoming second dominant at the later stage of the study.

DPP-4, dipeptidyl peptidase-4; OHA, oral hypoglycemic agent.

### **Online Supplementary Figure 2 Kaplan-Meier analysis of microvascular complications**

(A) Retinopathy, (B) Nephropathy and (C) Neuropathy.

A combination of 'onset' and 'progression' was analyzed. Between-group comparisons were performed by long-rank test.

### **Online Supplementary Figure 3 Over-time changes of HbA1c**

Measurements (mean  $\pm$  SD) were plotted against each visit. Between-group comparisons were performed by 2-sample t test, and statistical significance is represented as \*\*\*P<0.001 at baseline, and then P=0.204, \*P=0.015, \*\*\*P<0.001, \*\*P=0.001, \*\*P=0.002, and \*\*\*P<0.001, respectively.

SD, standard deviation.
